# Supplementary material for: Synthesis, characterisation and chiroptical properties of ‘click’able polyisocyanopeptides
Source: Royal Society of Chemistry journal article supplement (doi:10.1039/b701922j), 2007-01-01
Supplement: b701922j.pdf [file b701922j.pdf]

Electronic Supporting Information for:

**Synthesis, characterisation and chiroptical properties of ‘click’able  
polyisocyanopeptides**

**Erik Schwartz, Heather J. Kitto, René de Gelder, Roeland J. M. Nolte,  
Alan E. Rowan and Jeroen J. L. M. Cornelissen\***

**Compounds**

**Boc-L-alanine prop-2-ynol ester (L-BAPE) 6**

Boc-L-alanine-OH (4.40 g, 23.3 mmol) and 2-propynol (1.54 g, 27.5 mmol, 1.2 equiv.) were dissolved in CH<sub>2</sub>Cl<sub>2</sub> (300 mL). To this solution diisopropylethylamine (DIPEA; 4.3 mL, 26 mmol, 1.1 equiv.), 1-hydroxybenzotriazole (HOBT; 3.97 g, 25.9 mmol, 1.1 equiv.) and finally 1-(3-dimethylaminopropyl)-3-ethylcarbodiimide hydrochloride (EDC; 4.9 g, 25.6 mmol, 1.1 equiv.) were added. After stirring for 10 hours the solvent was evaporated *in vacuo* and the product was redissolved in CHCl<sub>3</sub> (200 mL). This solution was subsequently washed with an aqueous 10% (w/w) citric acid solution (2 × 200 mL), H<sub>2</sub>O (200 mL), an aqueous 10% (w/w) sodium carbonate solution (2 × 200 mL) and H<sub>2</sub>O (200 mL). The organic layer was dried (Na<sub>2</sub>SO<sub>4</sub>), concentrated and subjected to column chromatography (2% MeOH in CHCl<sub>3</sub>), yielding 92% of 6 as a colorless oil.  $[\alpha]_D -17$  (*c* 0.8 in CHCl<sub>3</sub>). <sup>1</sup>H NMR ( $\delta$  ppm, CDCl<sub>3</sub>): 5.03 (s, 1H, NH), 4.71 (m, 2H, C≡CCH<sub>2</sub>), 4.32 (m, 1H, CH Ala), 2.47 (t, 1H, HC≡C, *J* 2.4), 1.41 (s, 9H, C(CH<sub>3</sub>)<sub>3</sub>), 1.38 (d, 3H, CH<sub>3</sub> Ala, *J* 7.2). <sup>13</sup>C NMR ( $\delta$  ppm, CDCl<sub>3</sub>): 172.3, 154.8 (C=O), 80.0 (C(CH<sub>3</sub>)<sub>3</sub>), 77.2 (HC≡CCH<sub>2</sub>), 75.4 (HC≡CCH<sub>2</sub>), 52.8 (CH Ala), 49.3 (HC≡CCH<sub>2</sub>), 28.6 (C(CH<sub>3</sub>)<sub>3</sub>), 18.6 (CH<sub>3</sub> Ala). FT-IR (cm<sup>-1</sup>, ATR): 3299 (NH), 2128 (C≡C), 1748 (C=O ester), 1701 (Amide I), 1506 (amide II). MS-CI: *m/z* = 228 [M+H]<sup>+</sup>. HRMS for C<sub>11</sub>H<sub>18</sub>NO<sub>4</sub>: Calcd 228.1236. Found: 228.1230.

### **Boc-L-alanyl-L-alanine prop-2-ynol ester (L,L-BAAPE)**

**L-BAAPE** (2.03 g, 8.9 mmol) was dissolved in HCl-saturated ethyl acetate (100 mL). The mixture was stirred for 5 hours after which the reaction mixture was concentrated to a small volume, *t*-BuOH/CH<sub>2</sub>Cl<sub>2</sub> was added and evaporated under reduced pressure twice, to remove the excess of HCl. The resulting L-alanine prop-2-ynol ester HCl salt was dissolved in CH<sub>2</sub>Cl<sub>2</sub> (200 mL). To this solution Boc-L-alanine-OH (1.88 g, 9.9 mmol, 1.1 equiv.), DIPEA (3.3 mL, 20 mmol, 2.2 equiv.), HOBT (1.52 g, 9.9 mmol, 1.1 equiv.) and finally EDC (1.92 g, 10.0 mmol, 1.1 equiv.) were added. After stirring for 36h the solvent was evaporated *in vacuo* and the product was redissolved in CHCl<sub>3</sub> (150 mL). This solution was washed with an aqueous 10% (w/w) citric acid solution (2 × 150 mL), H<sub>2</sub>O (150 mL), an aqueous 10 % (w/w) sodium carbonate solution (2 × 150 mL) and H<sub>2</sub>O (150 mL). The organic layer was dried (Na<sub>2</sub>SO<sub>4</sub>), concentrated and subjected to column chromatography (2% MeOH in CHCl<sub>3</sub>), yielding 1.9 g of **L,L-BAAPE** in 72% yield as a white powder. Mp: 84 °C. [α]<sub>D</sub> -41 (*c* 0.9 in CHCl<sub>3</sub>). <sup>1</sup>H NMR (δ ppm, CDCl<sub>3</sub>): 7.07 (s, 1H, NH), 5.38 (d, 1H, NH, *J* 7.5), 4.67 (m, 2H, HC≡CCH<sub>2</sub>), 4.52 (quintet, 1H, CH Ala *J* 7.2), 2.45 (t, 1H, HC≡C, *J* 6.0), 1.36 (s, 9H, C(CH<sub>3</sub>)<sub>3</sub>), 1.29 (m, 6H, CH<sub>3</sub> Ala). <sup>13</sup>C NMR (δ ppm, CDCl<sub>3</sub>): 172.7, 171.9, 155.5 (C=O), 79.9 (C(CH<sub>3</sub>)<sub>3</sub>), 77.2 (HC≡CCH<sub>2</sub>), 75.5 (HC≡CCH<sub>2</sub>), 52.8 (CH Ala), 49.8 (HC≡CCH<sub>2</sub>), 47.9 (CH Ala), 28.3 (C(CH<sub>3</sub>)<sub>3</sub>), 18.5, 17.7 (CH<sub>3</sub> Ala). FT-IR (cm<sup>-1</sup>, ATR): 3270 (NH), 2135 (C≡C), 1738 (C=O ester), 1679, 1653 (Amide I), 1555, 1518 (amide II). MS-CI: *m/z* = 299 [M+H]<sup>+</sup>. HRMS for C<sub>14</sub>H<sub>23</sub>N<sub>2</sub>O<sub>5</sub>: Calcd 299.1607. Found: 299.1595.

### **Boc-D-alanyl-L-alanine prop-2-ynol ester (D,L-BAAPE) 7**

Starting from **6** and Boc-D-alanine-OH, following the same procedure as for **L,L-BAAPE**, **D,L-BAAPE** was obtained as a viscous colorless oil (yield 46%). [α]<sub>D</sub> +24 (*c* 1.3 in CHCl<sub>3</sub>). <sup>1</sup>H NMR (δ ppm, CDCl<sub>3</sub>): 6.76 (s, 1H, NH), 4.98 (s, 1H, NH), 4.72 (m, 2H, HC≡CCH<sub>2</sub>), 4.59 (quintet, 1H, CH Ala *J* 7.2), 2.48 (t, 1H, HC≡C, *J* 2.4), 1.44 (s, 9H, C(CH<sub>3</sub>)<sub>3</sub>), 1.42 (d, 4H, CH<sub>3</sub> Ala, *J* 7.2), 1.35 (d, 4H, CH<sub>3</sub> Ala, *J* 6.9). <sup>13</sup>C NMR (δ ppm, CDCl<sub>3</sub>): 172.4, 172.2, 155.7 (C=O), 80.5 (C(CH<sub>3</sub>)<sub>3</sub>), 77.2 (HC≡CCH<sub>2</sub>), 75.5 (HC≡CCH<sub>2</sub>), 52.9 (CH Ala), 50.1 (HC≡CCH<sub>2</sub>), 48.0 (CH Ala), 28.4 (C(CH<sub>3</sub>)<sub>3</sub>),

18.2, 17.3 (CH<sub>3</sub> Ala). FT-IR (cm<sup>-1</sup>, ATR): 3297 (NH), 2128 (C≡C), 1747 (C=O ester), 1700, 1660 (Amide I), 1512 (br, amide II). MS-CI: m/z = 299 [M+H]<sup>+</sup>. HRMS for C<sub>14</sub>H<sub>23</sub>N<sub>2</sub>O<sub>5</sub>: Calcd 299.1607. Found: 299.1600.

#### **Boc-L-alanine-(3-trimethylsilyl) prop-2-ynol ester (L-BAPE-TMS)**

Following a similar procedure as for L-BAPE, L-BAPE-TMS was obtained in 77% yield as a colorless oil. [α]<sub>D</sub> -16 (*c* 0.8 in CHCl<sub>3</sub>). <sup>1</sup>H NMR (δ ppm, CDCl<sub>3</sub>): 5.03 (s, 1H, NH), 4.71 (d, 2H, HC≡CCH<sub>2</sub>, *J* 1.8), 4.31 (m, 1H, CH Ala), 1.42 (s, 9H, C(CH<sub>3</sub>)<sub>3</sub>), 1.38 (d, 3H, CH<sub>3</sub> Ala *J* =7.2 ), 0.15 (s, 9H, Si-CH<sub>3</sub>). <sup>13</sup>C NMR (δ ppm, CDCl<sub>3</sub>): 172.7, 155.2 (C=O), 98.6 (C≡CCH<sub>2</sub>), 92.7 (C≡CCH<sub>2</sub>), 80.0 (C(CH<sub>3</sub>)<sub>3</sub>), 53.6 (C≡CCH<sub>2</sub>), 49.3 (CH Ala), 28.4 (C(CH<sub>3</sub>)<sub>3</sub>), 18.6 (CH<sub>3</sub> Ala), 0.1 (Si-CH<sub>3</sub>). FT-IR (cm<sup>-1</sup>, ATR): 3277 (NH), 2187 (C≡C), 1747 (C=O ester), 1714 (Amide I), 1505 (amide II), 1250 (Si-CH<sub>3</sub>). MS-ESI m/z = 322 [M+Na]<sup>+</sup>. HRMS for C<sub>14</sub>H<sub>25</sub>NO<sub>4</sub>SiNa : Calcd 322.1434. Found: 322.1450.

#### **Boc-D-alanyl-L-alanine-(3-trimethylsilyl) prop-2-ynol ester (D,L-BAPE-TMS)**

Following a similar procedure as for D,L-BAAPE, D,L-BAAPE-TMS was obtained as a colorless oil in 75% yield. [α]<sub>D</sub> +28 (*c* 1.2 in CHCl<sub>3</sub>). <sup>1</sup>H NMR (δ ppm, CDCl<sub>3</sub>): 7.05 (s, 1H, NH), 5.40 (s, 1H, NH), 4.63 (d, 2H, HC≡CCH<sub>2</sub>, *J* 2.0 ), 4.52 (quintet, 1H, CH Ala, *J* 7.3 ), 1.35 (m, 12H, C(CH<sub>3</sub>)<sub>3</sub>, CH<sub>3</sub> Ala), 1.26 (d, 3H, CH<sub>3</sub> Ala, *J* =7.1 ), 0.07 (s, 9H, Si-CH<sub>3</sub>). <sup>13</sup>C NMR (δ ppm, CDCl<sub>3</sub>): 172.6, 172.1, 155.5 (C=O), 98.4 (C≡CCH<sub>2</sub>), 92.5 (C≡CCH<sub>2</sub>), 79.9 (C(CH<sub>3</sub>)<sub>3</sub>), 53.5 (C≡CCH<sub>2</sub>), 49.9, 47.9 (CH Ala), 28.3 (C(CH<sub>3</sub>)<sub>3</sub>), 18.3, 17.9 (CH<sub>3</sub> Ala), -0.4 (Si-CH<sub>3</sub>). MS-ESI m/z = 393 [M+Na]<sup>+</sup>. HRMS for C<sub>17</sub>H<sub>30</sub>N<sub>2</sub>O<sub>5</sub>SiNa : Calcd 393.1826. Found: 393.1822. FT-IR (cm<sup>-1</sup>, ATR): 3313 (br,NH), 2186 (C≡C), 1747 (C=O ester), 1661 (Amide I), 1514 (amide II), 1250 (Si-CH<sub>3</sub>).

### **Boc-L-alanine hept-6-ynol ester (L-BAHE)**

Starting from Boc-L-alanine-OH and hept-6-ynol, **L-BAHE** was prepared following a similar procedure as for **L-BAPE**, with the exception that the product was purified by column chromatography (Heptane-EtOAc 7:3 v/v, followed by 2% MeOH in CHCl<sub>3</sub>). **L-BAHE** was obtained as a colorless oil (yield 78%). [ $\alpha$ ]<sub>D</sub> -4 (*c* 2.1 in CHCl<sub>3</sub>). <sup>1</sup>H NMR ( $\delta$  ppm, CDCl<sub>3</sub>): 5.03 (d, 1H, NH, *J* 7.8 ), 4.28 (m, 1H, CH Ala), 4.13 (m, 3H, OCH<sub>2</sub>, CH Ala), 2.19 (m, 2H, HC≡CCH<sub>2</sub>), 1.93 (t, 1H, HC≡CCH<sub>2</sub>, *J* 2.7 ), 1.65 (quintet, 2H, CH<sub>2</sub>, *J* 7.2 ), 1.52 (m, 4H, CH<sub>2</sub>), 1.42 (s, 9H, C(CH<sub>3</sub>)<sub>3</sub>), 1.36 (d, 3H, CH<sub>3</sub> Ala, *J* 7.2 ). <sup>13</sup>C NMR ( $\delta$  ppm, CDCl<sub>3</sub>): 173.5, 155.2 (C=O), 84.2 (C≡CCH<sub>2</sub>), 80.0 (C(CH<sub>3</sub>)<sub>3</sub>), 68.6 (C≡CCH<sub>2</sub>), 65.2 (OCH<sub>2</sub>), 49.4 (CH Ala), 28.4 (C(CH<sub>3</sub>)<sub>3</sub>), 28.2, 28.1, 25.0, 18.9 (CH<sub>2</sub>), 18.4 (CH<sub>3</sub> Ala). FT-IR (cm<sup>-1</sup>, ATR): 3377, 3303 (NH), 2111 (C≡C), 1710 (br, C=O ester, amide I), 1510 (amide II). MS-ESI *m/z* = 306 [M+Na]<sup>+</sup>. HRMS for C<sub>15</sub>H<sub>25</sub>N<sub>1</sub>O<sub>4</sub>Na : Calcd 306.1681. Found: 301.1701.

### **Boc-L-alanyl-L-alanine hept-6-ynol ester (L,L-BAAHE)**

Following a similar procedure as for **L-BAPE**, **L,L-BAAHE** was obtained in 60% yield as a colorless oil.

[ $\alpha$ ]<sub>D</sub> -18 (*c* 0.9 in CHCl<sub>3</sub>). <sup>1</sup>H NMR ( $\delta$  ppm, CDCl<sub>3</sub>): 6.79 (s, 1H, NH), 5.18 (d, 1H, NH, *J* 7.8 ), 4.51 (quintet, 1H, CH Ala, *J* 7.2 ), 4.10 (m, 3H, OCH<sub>2</sub>, CH Ala), 2.16 (m, 2H, HC≡CCH<sub>2</sub>), 1.92 (t, 1H, HC≡CCH<sub>2</sub>, *J* 2.7 ), 1.63 (quintet, 2H, CH<sub>2</sub>, *J* 7.0 ), 1.49 (m, 4H, CH<sub>2</sub>), 1.40 (s, 9H, C(CH<sub>3</sub>)<sub>3</sub>), 1.36 (d, 3H, CH<sub>3</sub> Ala, *J* 7.2 ), 1.32 (d, 3H, CH<sub>3</sub> Ala, *J* 7.0 ). <sup>13</sup>C NMR ( $\delta$  ppm, CDCl<sub>3</sub>, 50 M): 172.8, 172.4, 155.5 (C=O), 84.1 (C≡CCH<sub>2</sub>), 80.0 (C(CH<sub>3</sub>)<sub>3</sub>), 68.6 (C≡CCH<sub>2</sub>), 65.3 (OCH<sub>2</sub>), 50.0, 48.1 (CH Ala), 28.4 (C(CH<sub>3</sub>)<sub>3</sub>), 28.1, 28.0, 24.9 (CH<sub>2</sub>), 18.5 (CH<sub>3</sub> Ala), 18.4 (CH<sub>2</sub>), 18.3 (CH<sub>3</sub> Ala). FT-IR (cm<sup>-1</sup>, ATR): 3299 (NH), 2116 (C≡C), 1736 (C=O ester), 1661 (Amide I), 1519 (amide II). MS-ESI *m/z* = 377 [M+Na]<sup>+</sup>. HRMS for C<sub>18</sub>H<sub>30</sub>N<sub>2</sub>O<sub>5</sub>Na: Calcd 377.2052 Found: 377.2040.

Supplementary material (ESI) for Journal of Materials Chemistry  
This journal is © The Royal Society of Chemistry 2007

**Boc-D-alanyl-L-alanine hept-6-ynol ester (D,L-BAAHE)**

Following a similar procedure as for L-BAPE, D,L-BAAHE was obtained in 75 % yield as a colorless oil.  $[\alpha]_D^{25} +28$  (c 0.8 in CHCl<sub>3</sub>). <sup>1</sup>H NMR (δ ppm, CDCl<sub>3</sub>): 6.82 (s, 1H, NH), 5.14 (d, 1H, NH, J 7.5 ), 4.51 (quintet, 2H, CH Ala, J 7.2 ), 4.12 (m, 3H, OCH<sub>2</sub>, CH Ala), 2.16 (m, 2H, HC≡CCH<sub>2</sub>), 1.91 (t, 1H, HC≡CCH<sub>2</sub>, J 2.7 ), 1.63 (quintet, 2H, CH<sub>2</sub>, J 6.9 ), 1.48 (m, 4H, CH<sub>2</sub>), 1.41 (s, 9H, C(CH<sub>3</sub>)<sub>3</sub>), 1.36 (d, 3H, CH<sub>3</sub> Ala, J 7.2 ), 1.32 (d, 3H, CH<sub>3</sub> Ala, J 7.2 ). <sup>13</sup>C NMR (δ ppm, CDCl<sub>3</sub>): 172.9, 172.3, 155.5 (C=O), 84.2 (C≡CCH<sub>2</sub>), 80.1 (C(CH<sub>3</sub>)<sub>3</sub>), 68.6 (C≡CCH<sub>2</sub>), 65.3 (OCH<sub>2</sub>), 50.3, 48.1 (CH Ala), 28.4 (C(CH<sub>3</sub>)<sub>3</sub>), 28.1, 28.0, 24.9 (CH<sub>2</sub>), 18.4 (CH<sub>3</sub> Ala), 18.3 (CH<sub>2</sub>, CH<sub>3</sub> Ala). FT-IR (cm<sup>-1</sup>, ATR): 3299 (NH), 2116 (C≡C), 1711 (C=O ester), 1663 (Amide I), 1513 (amide II). MS-ESI m/z = 377 [M+Na]<sup>+</sup>. HRMS for C<sub>18</sub>H<sub>30</sub>N<sub>2</sub>O<sub>5</sub>Na : Calcd 377.2052 Found: 377.2050.

**Table 1.** Selected IR ( $\nu$  in  $\text{cm}^{-1}$ ) and  $^1\text{H}$  NMR (measured in  $\text{CDCl}_3$ ,  $\delta$  in ppm) spectral data

|                           | $\nu_{\text{NH}}$<br>( $\text{CH}_2\text{Cl}_2$ ) | $\nu_{\text{amide I}}$<br>( $\text{CH}_2\text{Cl}_2$ ) | $\nu_{\text{NH}}$<br>(solid) | $\nu_{\text{amide I}}$<br>(solid) | $\delta_{\text{NH}}$<br>( $\text{CHCl}_3$ ) |
|---------------------------|---------------------------------------------------|--------------------------------------------------------|------------------------------|-----------------------------------|---------------------------------------------|
| <b>D,L-IAAPE (9)</b>      | 3434                                              | 1710, 1692                                             | 3277                         | 1665                              |                                             |
| <b>D,L-PIAAPE(10)</b>     | 3264                                              | 1657                                                   | 3271                         | 1653                              |                                             |
| <b>D,L-IAAPETMS (11)</b>  | 3427                                              | 1711, 1692                                             | 3318                         | 1668                              |                                             |
| <b>D,L-PIAAPETMS (12)</b> | 3268, 3320                                        | 1657                                                   | 3284                         | 1655                              | 8.5                                         |
| <b>L,L-IAAPE</b>          | 3430                                              | 1710, 1694                                             | 3281                         | 1665                              |                                             |
| <b>L,L-PIAAPE (13)</b>    | 3261                                              | 1656                                                   | 3280, 3262                   | 1655                              | 9.3                                         |
| <b>D,L-IAAHE</b>          | 3431                                              | 1689                                                   | 3299                         | 1673                              |                                             |
| <b>D,L-PIAAHE (14)</b>    | 3266                                              | 1656                                                   | 3264                         | 1655                              | 8.9                                         |
| <b>L,L-IAAHE</b>          | 3429                                              | 1689                                                   | 3291                         | 1672                              |                                             |
| <b>L,L-PIAAHE (15)</b>    | 3288                                              | <sup>a</sup>                                           | 3356, 3284                   | 1685, 1644                        | 8.7                                         |

<sup>a</sup> No shift observed for the Amide I vibration

### Circular Dichroism

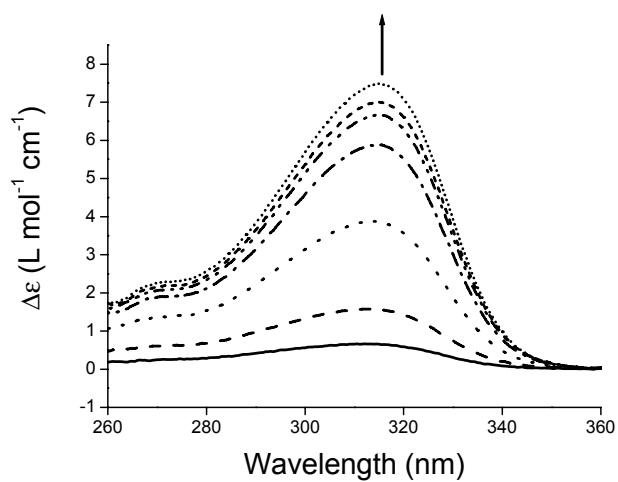

**Figure 1** CD monitored polymerisation of **13** with 1/30 equiv. of Ni(II).

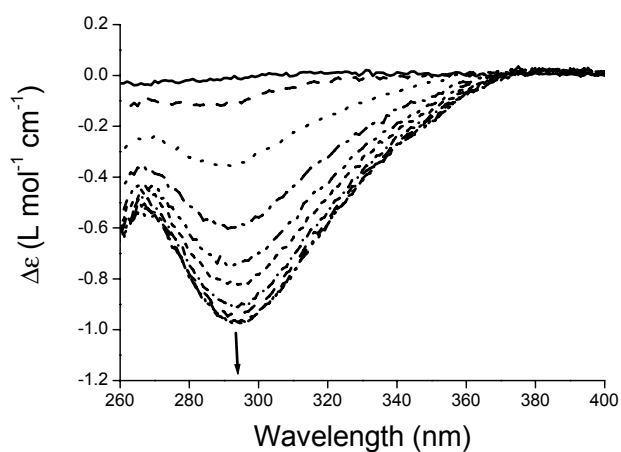

**Figure 2** CD monitored polymerisation of **15** with 1/30 equiv. of Ni(II).

**X-ray data**

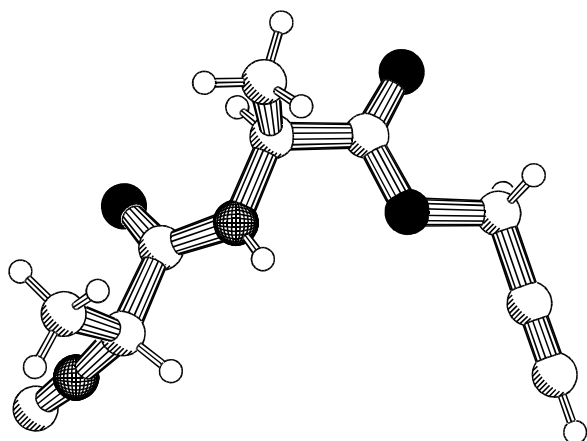

**Figure 3** Single crystal X-ray structure of monomer **9**

**Table 2** Crystal data and structure refinement for **9**.

|                        |                                                               |
|------------------------|---------------------------------------------------------------|
| Identification code    | ERIK07                                                        |
| Crystal colour         | translucent colourless                                        |
| Crystal shape          | rough fragment                                                |
| Crystal size           | 0.23 x 0.18 x 0.03 mm                                         |
| Empirical formula      | C <sub>10</sub> H <sub>12</sub> N <sub>2</sub> O <sub>3</sub> |
| Formula weight         | 208.22                                                        |
| Temperature            | 298(2) K                                                      |
| Radiation / Wavelength | MoKalpha (graphite mon.) / 0.71073 Å                          |



Crystal system, space group      Triclinic, P1

Unit cell dimensions              a,  $\alpha$ = 4.7566(12) Å, 72.97(6) deg.

23 reflections                      b,  $\beta$ = 6.225(2) Å, 85.49(8) deg.

2.110 <  $\theta$  < 25.000 )      c,  $\gamma$ = 10.116(17) Å, 80.83(3) deg.

Volume                              282.6(5) Å<sup>3</sup>

Z, Calculated density              1, 1.224 Mg/m<sup>3</sup>

Absorption coefficient            0.092 mm<sup>-1</sup>

Diffractometer / scan              Nonius KappaCCD with area detector / phi and  
omega scan

F(000)                              110

Theta range for data collection 2.11 to 25.00 deg.
